# Supplementary material for: A Comparative Study of the Plasma Chemokine Profile in COVID-19 Patients Infected with Different SARS-CoV-2 Variants
Source: MDPI journal article supplement (doi:10.3390/ijms23169058), 2022-08-13
Supplement: s1 [file s1]

**Table S1.** Chemokine concentrations in blood plasma samples from patients infected with ancestral Wuhan strain of SARS-CoV-2 (COVID-19), n=56; and healthy donors (HD), n=51. Concentrations presented in pg/ml.

| <b>Chemokine</b>    | <b>COVID-19, n = 56<br/>Median (Q25-Q75)</b> | <b>HD, n = 51<br/>Median (Q25-Q75)</b> | <b>COVID-19 vs. HD<br/>p-value</b> |
|---------------------|----------------------------------------------|----------------------------------------|------------------------------------|
| CCL2/MCP-1          | 636.8 (458.5-951.8)                          | 208.5 (180.2-373.5)                    | <0.0001                            |
| CCL3/MIP-1 $\alpha$ | 58.8 (38.7-326.4)                            | 8.631 (6.1-30.7)                       | <0.0001                            |
| CCL4/MIP-1 $\beta$  | 22.91 (17.2-28.2)                            | 16.7 (12.5-22.5)                       | 0.0087                             |
| CCL7/MCP-3          | 26.1 (14.8-36.3)                             | 10.4 (6.0-24.7)                        | 0.0004                             |
| CCL11/Eotaxin       | 175.4 (121.1-355.2)                          | 80.61 (55.10-105.8)                    | <0.0001                            |
| CCL22/MDC           | 629.8 (513.8-749.8)                          | 873.5 (497.4-1265)                     | 0.0005                             |
| CXCL1/GRO $\alpha$  | 79.4 (55.1-115.4)                            | 22.2 (9.4-46.4)                        | <0.0001                            |
| CXCL8/IL-8          | 18.5 (15.5-27.3)                             | 3.2 (2.2-5.9)                          | <0.0001                            |
| CXCL9/MIG           | 3985.0 (7677.1-15917.8)                      | 1161 (364.0-1959)                      | <0.0001                            |
| CXCL10/IP-10        | 31238.0 (3213.5-40000.0)                     | 278.1 (147.9-451.9)                    | <0.0001                            |
| CX3CL1/Fractalkine  | 286.1 (202.3-393.5)                          | 135.0 (73.23-274.8)                    | <0.0001                            |

**Table S2.** Chemokine concentrations in blood plasma samples from patients infected with Alpha variant of SARS-CoV-2 (COVID-19), n=95; and healthy donors (HD), n=51. Concentrations presented in pg/ml.

| <b>Chemokine</b>    | <b>COVID-19, n = 95<br/>Median (Q25-Q75)</b> | <b>HD, n = 51<br/>Median (Q25-Q75)</b> | <b>COVID-19 vs. HD<br/>p-value</b> |
|---------------------|----------------------------------------------|----------------------------------------|------------------------------------|
| CCL2/MCP-1          | 430.9 (254.3-706.8)                          | 208.5 (180.2-373.5)                    | <0.0001                            |
| CCL3/MIP-1 $\alpha$ | 51.0 (40.3-62.3)                             | 8.631 (6.1-30.7)                       | 0.0002                             |
| CCL4/MIP-1 $\beta$  | 24.8 (21.7-30.7)                             | 16.7 (12.5-22.5)                       | <0.0001                            |
| CCL7/MCP-3          | 53.8 (39.8-70.1)                             | 10.4 (6.0-24.7)                        | <0.0001                            |
| CCL11/Eotaxin       | 90.7 (65.8-118.6)                            | 80.61 (55.10-105.8)                    | ns                                 |
| CCL22/MDC           | 474.1 (424.2-722.2)                          | 873.5 (497.4-1265)                     | 0.0067                             |
| CXCL1/GRO $\alpha$  | 37.67 (25.7-67.8)                            | 22.2 (9.4-46.4)                        | 0.004                              |
| CXCL8/IL-8          | 12.7 (7.9-20.7)                              | 3.2 (2.2-5.9)                          | <0.0001                            |
| CXCL9/MIG           | 5896.0 (3661.1-8790.2)                       | 1161 (364.0-1959)                      | <0.0001                            |
| CXCL10/IP-10        | 3142.1 (1004.1-40000.0)                      | 278.1 (147.9-451.9)                    | <0.0001                            |
| CX3CL1/Fractalkine  | 404.3 (273.9-549.7)                          | 135.0 (73.23-274.8)                    | <0.0001                            |

**Table S3.** Chemokine concentrations in blood plasma samples from patients infected with Delta variant of SARS-CoV-2 (COVID-19), n=78; and healthy donors (HD), n=51. Concentrations presented in pg/ml.

| <b>Chemokine</b>    | <b>COVID-19, n = 78<br/>Median (Q25-Q75)</b> | <b>HD, n = 51<br/>Median (Q25-Q75)</b> | <b>COVID-19 vs. HD<br/>p-value</b> |
|---------------------|----------------------------------------------|----------------------------------------|------------------------------------|
| CCL2/MCP-1          | 562.8 (319.0-779.3)                          | 208.5 (180.2-373.5)                    | <0.0001                            |
| CCL3/MIP-1 $\alpha$ | 11.59 (8.4-17.21)                            | 8.631 (6.1-30.7)                       | ns                                 |
| CCL4/MIP-1 $\beta$  | 16.3 (12.5-20.2)                             | 16.7 (12.5-22.5)                       | ns                                 |
| CCL7/MCP-3          | 16.8 (12.7-27.2)                             | 10.4 (6.0-24.7)                        | ns                                 |
| CCL11/Eotaxin       | 51.0 (40.0-75.3)                             | 80.61 (55.10-105.8)                    | 0.0001                             |
| CCL22/MDC           | 344.1 (247.2-461.9)                          | 873.5 (497.4-1265)                     | <0.0001                            |
| CXCL1/GRO $\alpha$  | 25.7 (15.5-56.9)                             | 22.2 (9.4-46.4)                        | ns                                 |
| CXCL8/IL-8          | 7.6 (3.9-16.1)                               | 3.2 (2.2-5.9)                          | <0.0001                            |
| CXCL9/MIG           | 2303.0 (1232.1-4459.0)                       | 1161 (364.0-1959)                      | <0.0001                            |
| CXCL10/IP-10        | 18488.0 (7084.2-53108.1)                     | 278.1 (147.9-451.9)                    | <0.0001                            |
| CX3CL1/Fractalkine  | 119.2 (88.2-161.8)                           | 135.0 (73.23-274.8)                    | ns                                 |

**Table S4.** Chemokine concentrations in blood plasma samples from patients infected with Omicron variant of SARS-CoV-2 (COVID-19), n=57; and healthy donors (HD), n=51. Concentrations presented in pg/ml.

| <b>Chemokine</b>    | <b>COVID-19, n=57<br/>Median (Q25-Q75)</b> | <b>HD, n = 51<br/>Median (Q25-Q75)</b> | <b>COVID-19 vs. HD<br/>p-value</b> |
|---------------------|--------------------------------------------|----------------------------------------|------------------------------------|
| CCL2/MCP-1          | 434.6 (286.9-628.9)                        | 208.5 (180.2-373.5)                    | <0.0001                            |
| CCL3/MIP-1 $\alpha$ | 13.35 (9.5-17.3)                           | 8.631 (6.1-30.7)                       | ns                                 |
| CCL4/MIP-1 $\beta$  | 22.4 (17.9-28.3)                           | 16.7 (12.5-22.5)                       | 0.0012                             |
| CCL7/MCP-3          | 18.5 (13.5-23.9)                           | 10.4 (6.0-24.7)                        | ns                                 |
| CCL11/Eotaxin       | 65.2 (54.6-88.7)                           | 80.61 (55.10-105.8)                    | ns                                 |
| CCL22/MDC           | 306.1 (252.6-455.5)                        | 873.5 (497.4-1265)                     | <0.0001                            |
| CXCL1/GRO $\alpha$  | 27.33 (14.9-49.1)                          | 22.2 (9.4-46.4)                        | ns                                 |
| CXCL8/IL-8          | 6.5 (4.3-10.5)                             | 3.2 (2.2-5.9)                          | <0.0001                            |
| CXCL9/MIG           | 3000.0 (1507.1-5951.2)                     | 1161 (364.0-1959)                      | <0.0001                            |
| CXCL10/IP-10        | 1506.1 (592.8-3194.2)                      | 278.1 (147.9-451.9)                    | <0.0001                            |
| CX3CL1/Fractalkine  | 137.0 (104.1-188.)                         | 135.0 (73.23-274.8)                    | ns                                 |
